# Supplementary material
Source: PubMed Central journal article supplement (PMC2665793)
Supplement: NIHMS91055-supplement-1_si_001.pdf [file NIHMS91055-supplement-1_si_001.pdf]

## Supporting Information

### NMR-Based Mapping of Disulfide Bridges in Cysteine-Rich Peptides: Application to the $\mu$ -Conotoxin SxIIIa

Aleksandra Walewska, Jack J. Skalicky, Darrell R. Davis, Min-Min Zhang, Estuardo Lopez-Vera, Maren Watkins, Tiffany S. Han, Doju Yoshikami, Baldomero M. Olivera, Grzegorz Bulaj

**Table S1.** Chemical Shifts for ( $^{15}\text{N}$ ,  $^{13}\text{C}$ -Cysteine) $_6$   $\mu$ -SxIIIa.

| Residue | N, H <sup>N</sup> | C <sup><math>\alpha</math></sup> , H <sup><math>\alpha</math></sup> | C <sup><math>\beta</math></sup> , H <sup><math>\beta</math></sup> , H <sup><math>\beta</math></sup> |
|---------|-------------------|---------------------------------------------------------------------|-----------------------------------------------------------------------------------------------------|
| Cys 2   |                   | 55.3, 5.04                                                          | 40.2, 2.73, 3.04                                                                                    |
| Cys 3   | 114.4, 8.37       | 55.0, 4.45                                                          | 38.9, 3.20, 3.45                                                                                    |
| Cys 10  | 119.1, 8.70       | 56.7, 4.88                                                          | 40.4, 2.97, 3.34                                                                                    |
| Cys 15  | 113.8, 7.55       | 53.2, 4.89                                                          | 37.8, 2.65, 3.69                                                                                    |
| Cys 20  | 113.8, 8.38       | 57.3, 4.58                                                          | 41.0, 2.64, 3.61                                                                                    |
| Cys 21  | 119.8, 7.71       | 54.9, 5.20                                                          | 39.7, 2.92, 3.33                                                                                    |

Figure S1

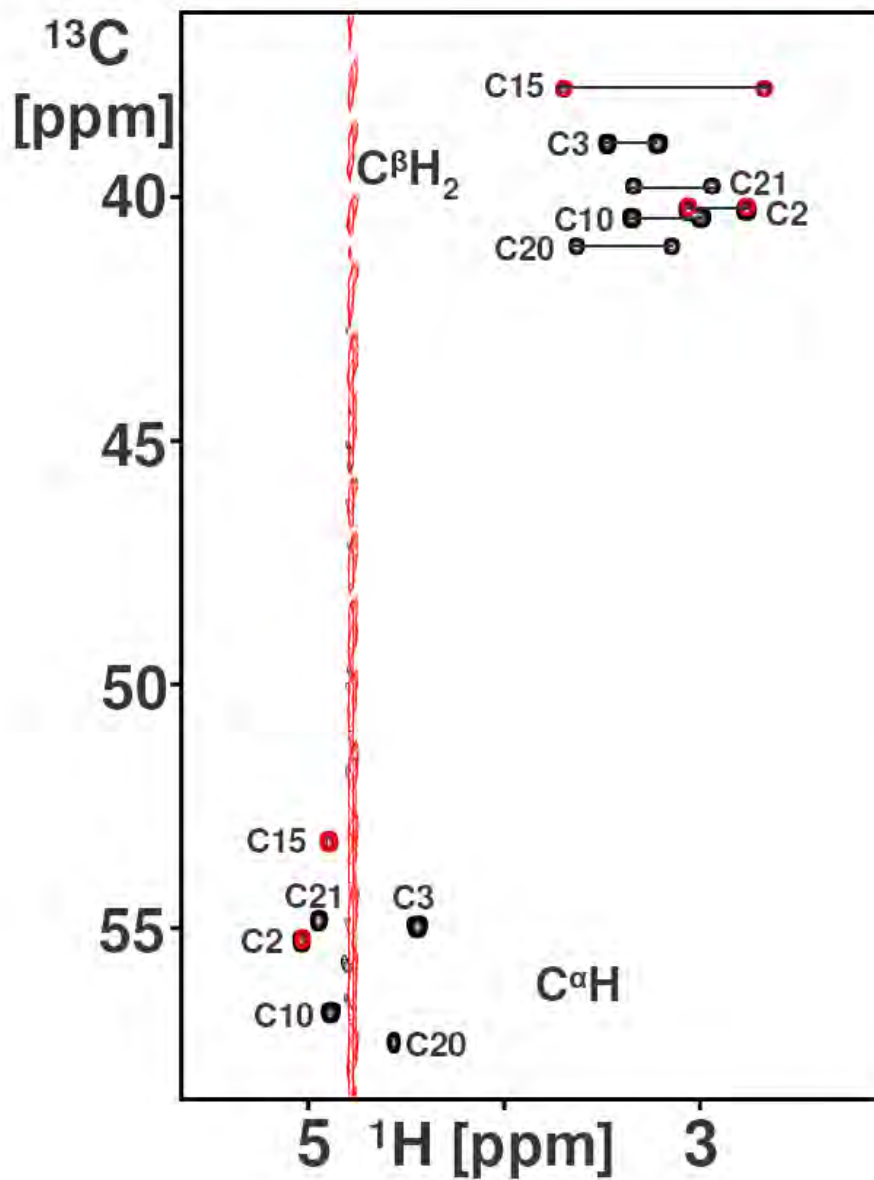

**Supplemental Figure 1.** Overlaid 2D [ $^{13}\text{C}$ ,  $^1\text{H}$ ] HSQC spectra of C2, C3, C10, C15, C20, C21  $^{15}\text{N}$ -, $^{13}\text{C}$ -enriched  $\mu$ -SxIII A (black) and C2, C15  $\mu$ -SxIII A (red). Note the superposition of  $\text{CH}^\alpha$  and  $\text{CH}^\beta$  signals for C2 and C15 and consistent resonance assignments.

Figure S2

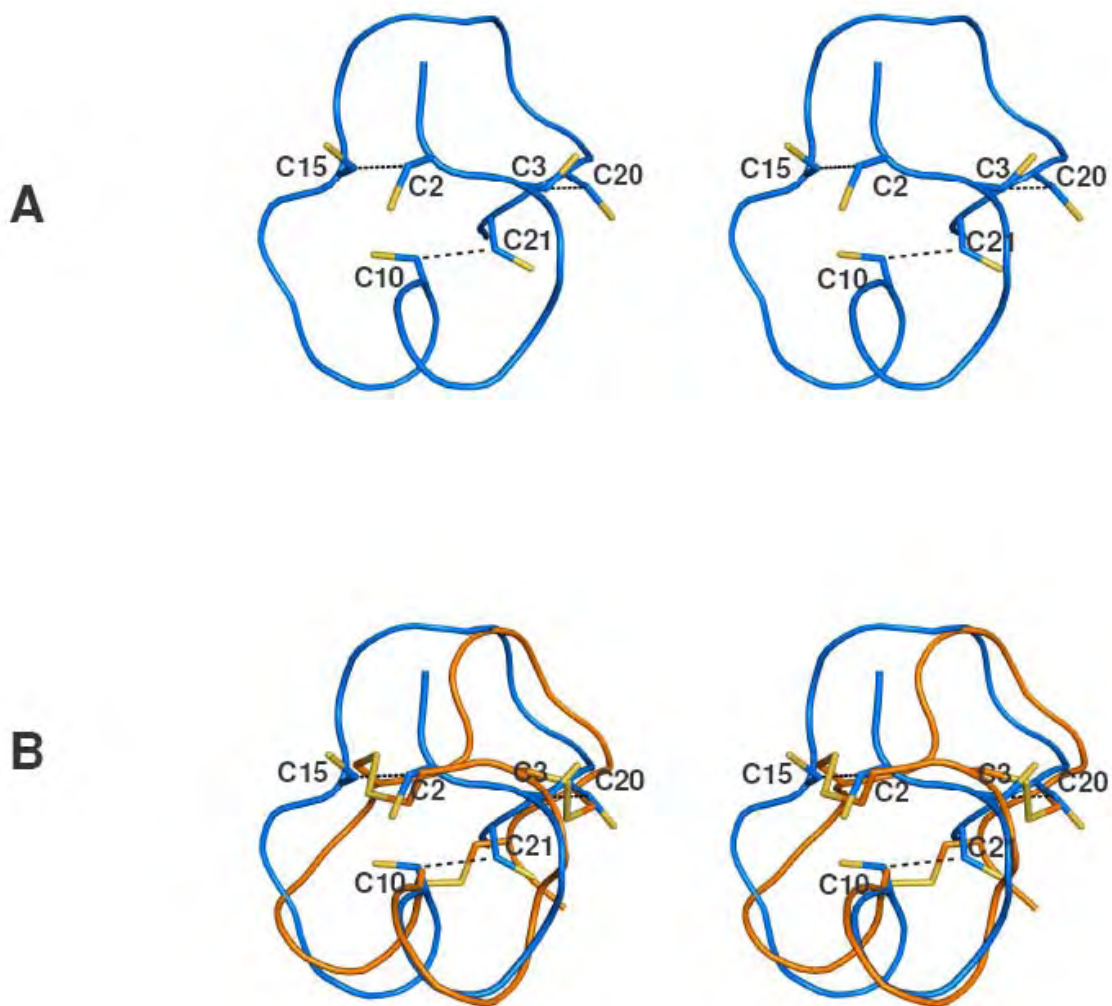

**Supplemental Figure 2.** Stereoview of a representative  $\mu$ -SxIII A structure calculated from the twelve NOEs listed in Figure 5 legend. The C2-C15, C3-C20, and C10-C21 cysteines are defined with six, five, and one NOE(s), respectively. **Part A** is a stereo representation of the most abundant conformer from our fold calculations. Cysteines are shown with side chain heavy atoms and labeled with residue number. **Part B** shows the

same molecule superimposed on the cysteine heavy atoms of  $\mu$ -SmIII A coordinates (1Q2J.pdb).  $\mu$ -SmIII A is shown with an orange cartoon and the cysteine side chains are shown.

**Figure S3**

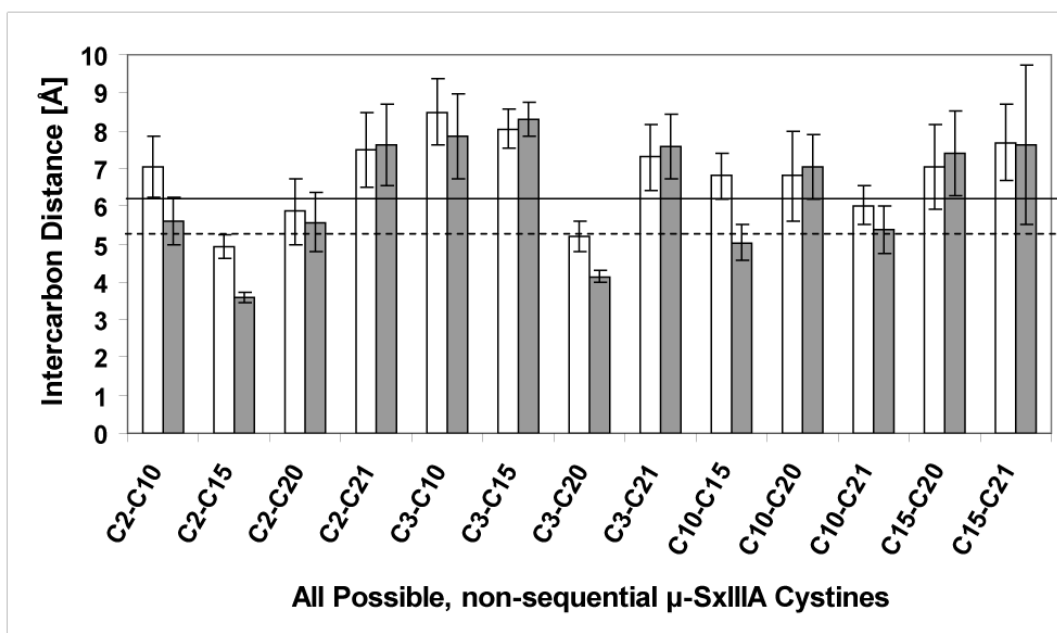

**Supplemental Figure 3.** Bar graph showing the average  $C^\alpha-C^\alpha$  (white) and  $C^\beta-C^\beta$  (grey) distances for all possible cysteines in ten calculated  $\mu$ -SxIII A structures. Error bars show one standard deviation. Most cysteines have a  $C^\alpha-C^\alpha$  distance of 5.2 Å (dashed line) for right-handed  $\chi_3$  and 6.1 Å (solid line) for left-handed  $\chi_3$  and a  $C^\beta-C^\beta$  distance of 2.9 – 4.6 Å with a most prevalent distance of 3.8 Å in proteins (Richardson DC, Richardson JS).

Principles and Patterns of Protein Conformation. In Prediction of Protein Structure and the Principles of Protein Conformation, G.D. Fasman, Ed., 1 ed. New York: Plenum Press (1989)1-98.). These criteria alone clearly identifies the C2-C15 and C3-C20 cystines. The remaining C10-C21 cystine has a  $C^\alpha-C^\alpha$  distance within the expected range however the  $C^\beta-C^\beta$  distance is too long; this can be explained by the absence of C21  $H^{\beta 2/3}$  constraints and by the fact that only one NOE defines the cystine. All other possible cystines have too large of  $C^\alpha-C^\alpha$  and/or  $C^\beta-C^\beta$  distances. From this structural exercise, we conclude that calculation of a family of NMR structures using this sparse set of NOEs is sufficient to unambiguously define the cystine pattern in  $\mu$ -SxIIIa.
